# Supplementary material for: Tumor mutation burden and circulating tumor DNA in combined CTLA-4 and PD-1 antibody therapy in metastatic melanoma – results of a prospective biomarker study
Source: PubMed Central journal article supplement (PMC6625062; doi:10.1186/s40425-019-0659-0), 2019-07-12

3

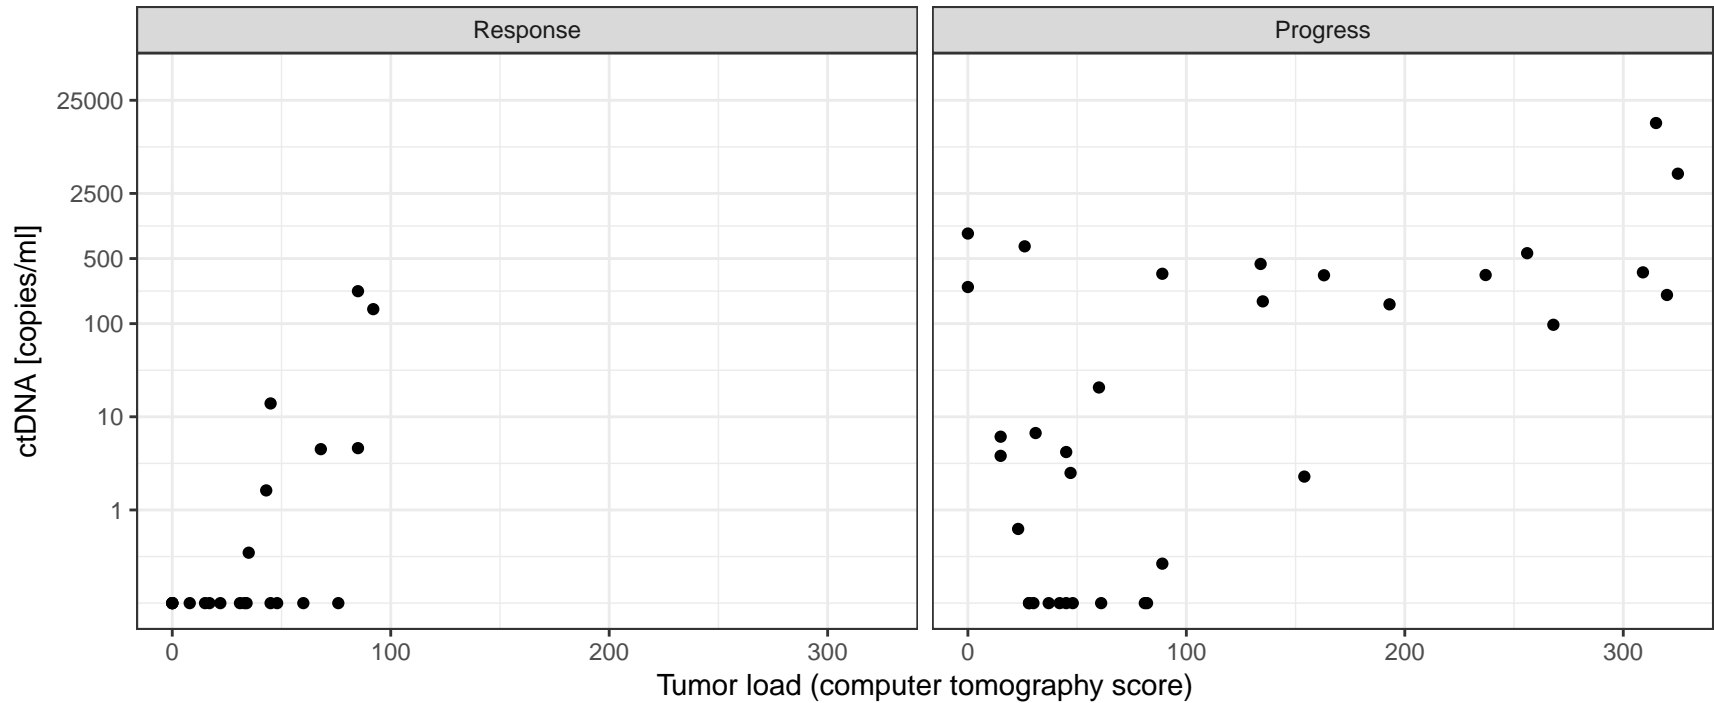

Supplement: 40425_2019_659_MOESM3_ESM.pdf [file 40425_2019_659_MOESM3_ESM.pdf]
